# Supplementary material for: The gut microbiome-prostate cancer crosstalk is modulated by dietary polyunsaturated long-chain fatty acids
Source: PubMed Central journal article supplement (PMC11039720; doi:10.1038/s41467-024-45332-w), 2024-04-23
Supplement: 41467_2024_45332_MOESM1_ESM.pdf [file 41467_2024_45332_MOESM1_ESM.pdf]

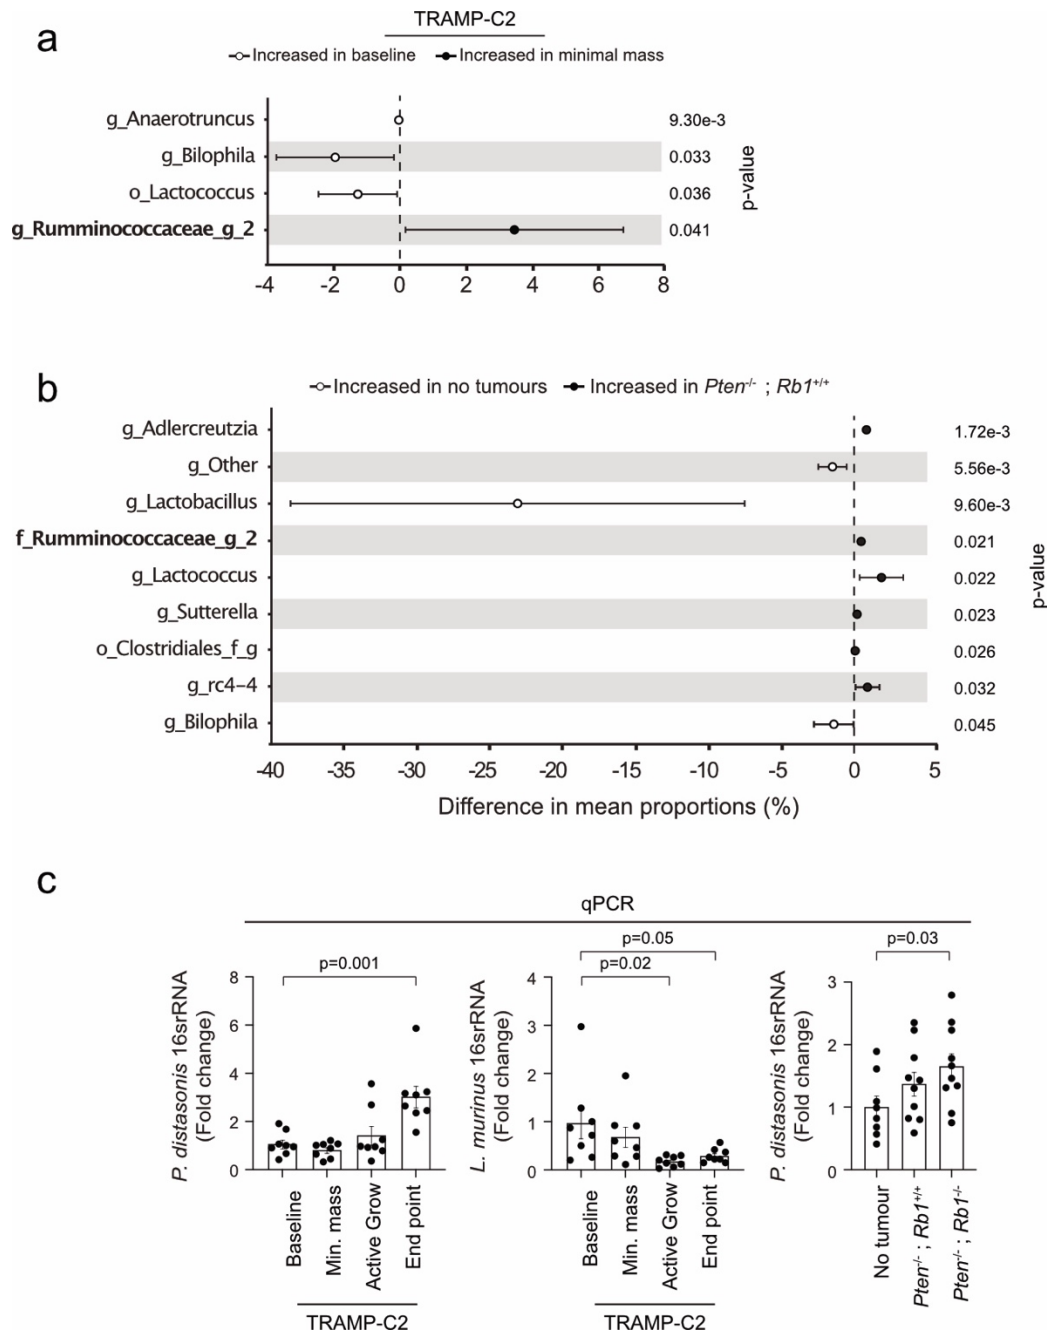

**Supplementary Fig. 1. Differentially abundant bacteria at the genus level.** **A** Fecal microbiota from mice with TRAMP-C2 tumours at the minimal mass growth stage were compared to the baseline before tumour cell injection (n=8 per group) using STAMP. **B** Fecal microbiota corresponding to mice with *Pten*<sup>-/-</sup>; *Rb1*<sup>+/+</sup> tumours compared to tumour-free mice (n=8 per group) using STAMP. **C** Relative levels (fold change) of total 16S rRNA sequences corresponding to *Parabacteroides distasonis* (left, n=8 per group) and *Lactobacillus murinus* (middle, n=8 per group) from fecal samples of mice with TRAMP-C2 tumour harvested at different stages of prostate cancer development. Relative levels (fold change) of total 16S rRNA sequences corresponding to *Parabacteroidetes distasonis* (right) from fecal samples of mice without tumour, with *Pten*<sup>-/-</sup>; *Rb1*<sup>+/+</sup> or *Pten*<sup>-/-</sup>; *Rb1*<sup>-/-</sup>, tumours (no tumour, n=8 and *Pten*<sup>-/-</sup>; *Rb1*<sup>+/+</sup> or *Pten*<sup>-/-</sup>; *Rb1*<sup>-/-</sup>, n=10). Graphs in A) and B) are mean ± SD. Graphs in C) are mean ± SEM, p-values in A) and B) are from two-sided Welch's T test and in C) p-values are from two-sided Student's T test.

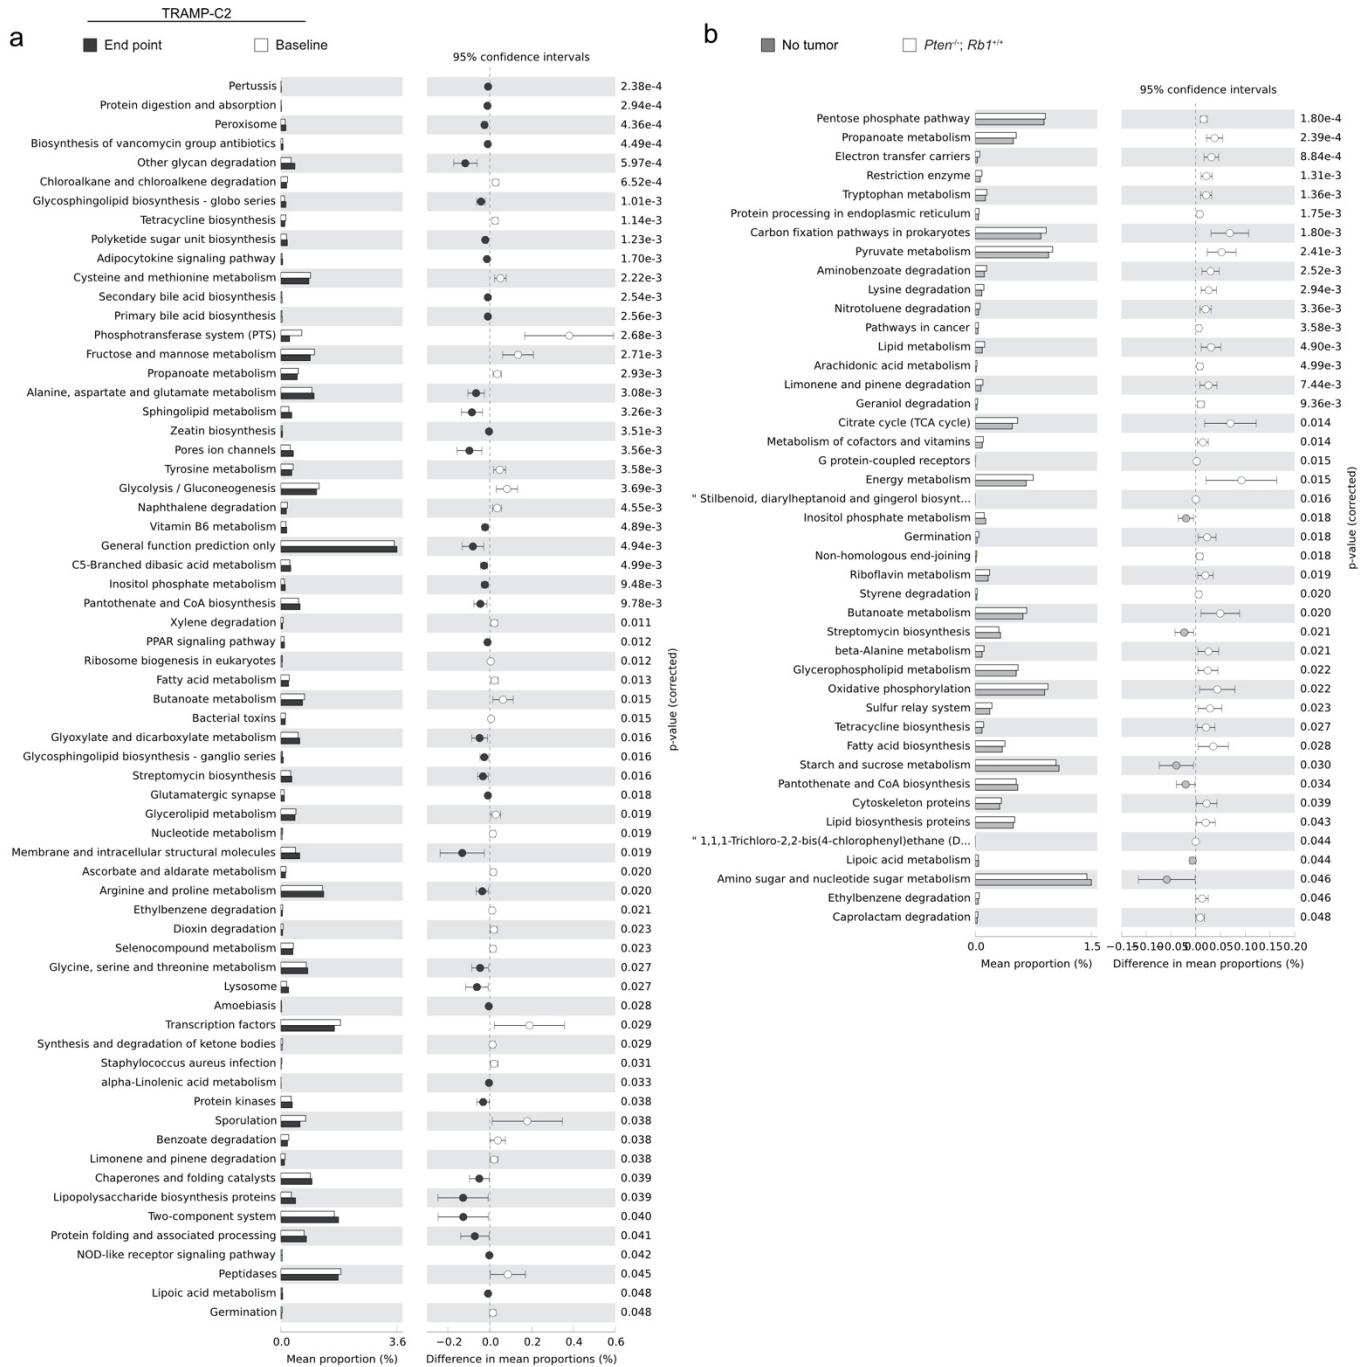

**Supplementary Fig. 2 part 1. STAMP analysis of predicted functions.** **A** Fecal microbiota comparison of mice with TRAMP-C2 tumours at the End point stage and baseline samples corresponding to main Fig. 2B. **B** Fecal microbiota comparison of mice with *Pten*<sup>-/-</sup>; *Rb1*<sup>+/+</sup> tumours and no tumour samples corresponding to main Fig. 2E. Graphs are mean ± SD, n=8 per group and p-values are from two-sided Welch's T test.

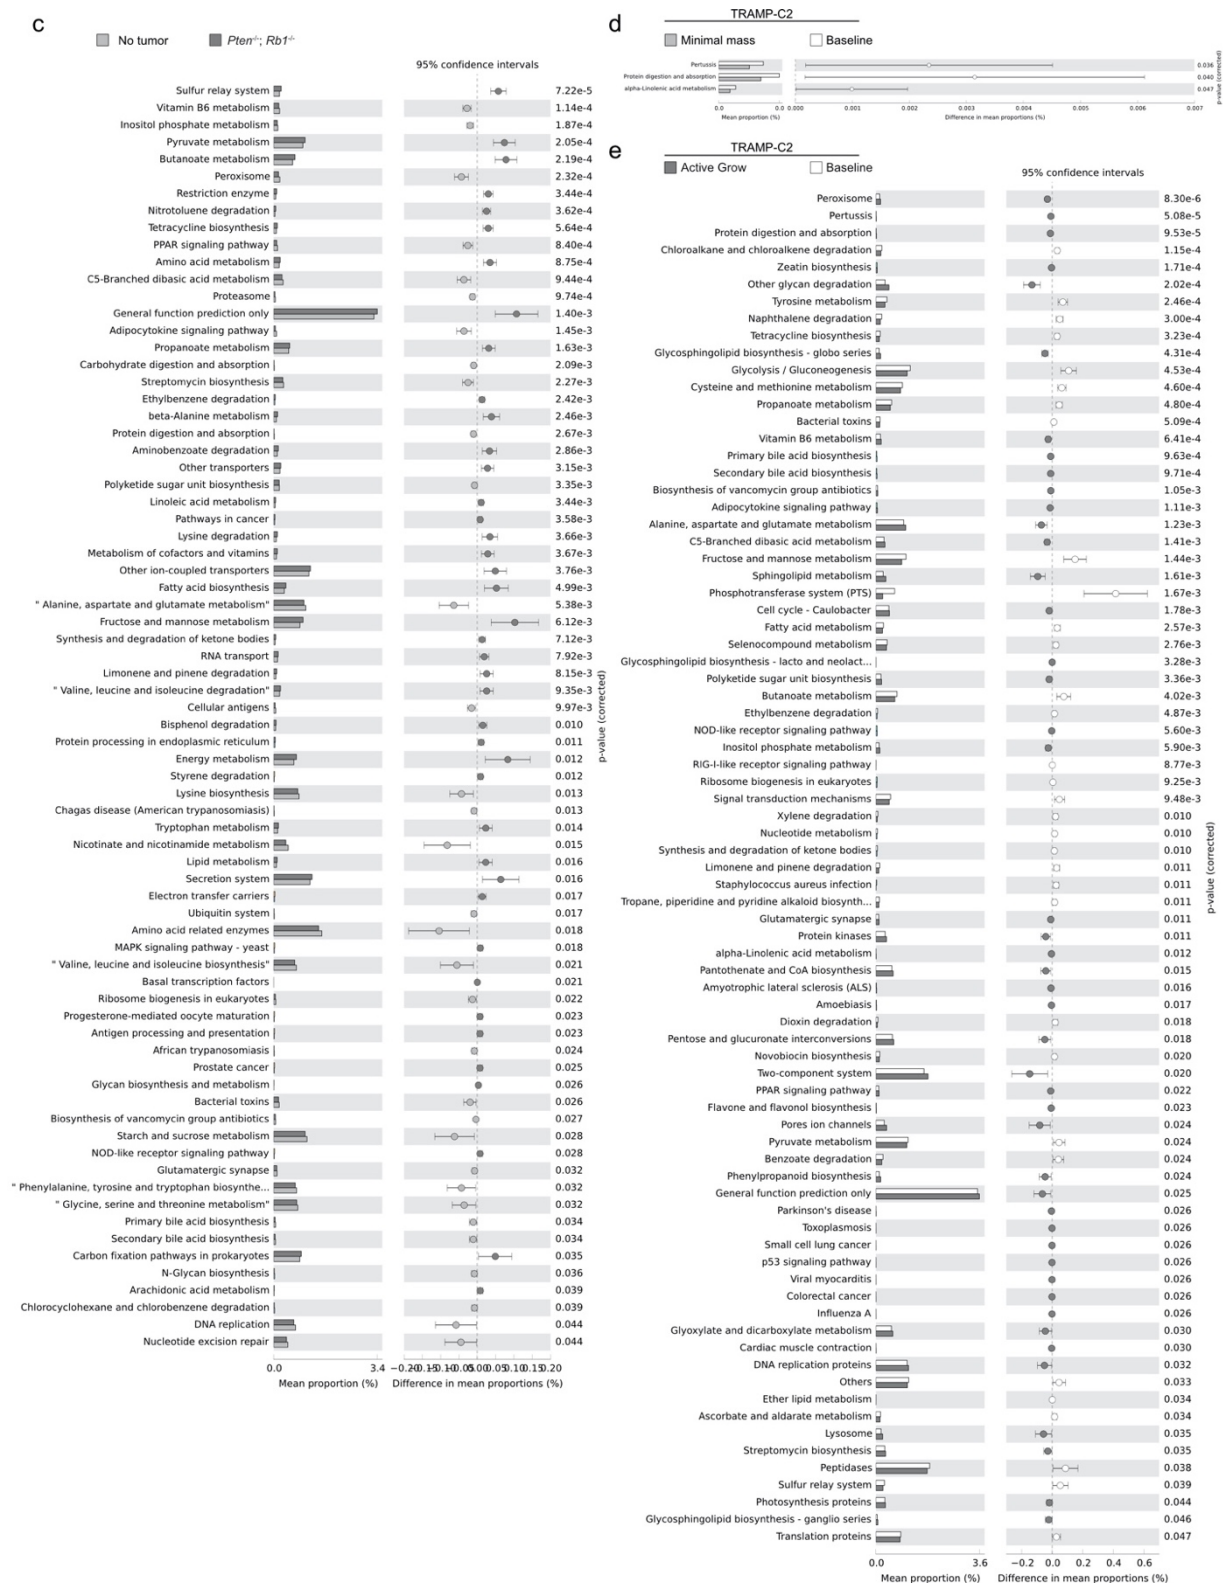

**Supplementary Fig. 2 part 2. STAMP analysis of predicted functions. C** Fecal microbiota comparison of mice with *Pten<sup>-/-</sup>;Rb1<sup>-/-</sup>* tumours and no tumour samples corresponding to main Fig. 2E. **D** Fecal microbiota comparison of mice with TRAMP-C2 tumours at the Minimal mass stage and baseline corresponding to main Fig. 2B. **E** Fecal microbiota comparison of mice with TRAMP-C2 tumours at the Exponential growth stage and baseline samples corresponding to main Fig. 2B. Graphs are mean  $\pm$  SD,  $n=8$  per group and p-values are from two-sided Welch's T test.

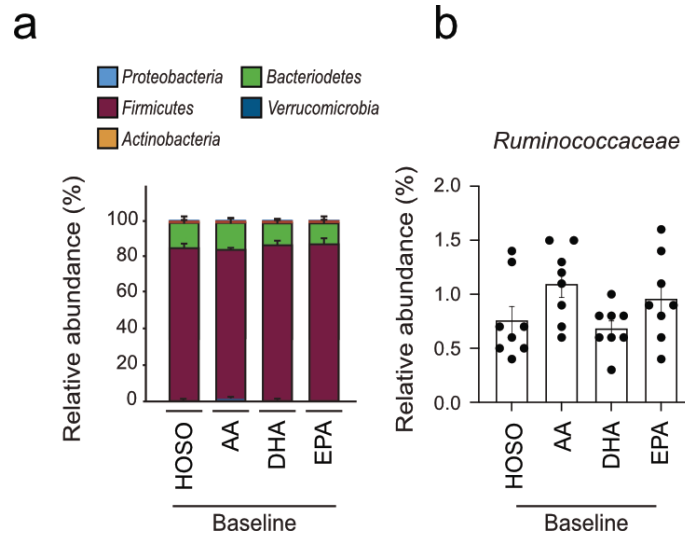

**Supplementary Fig. 3. Baseline gut microbiota in a mouse model of prostate cancer development.** **A** Relative abundance of baseline gut microbiota from mice before supplementation with high oleic sunflower oil (HOSO), monoglyceride arachidonic acid (MAG-AA), MAG-docosahexaenoic acid (DHA) or MAG-eicosapentaenoic acid (EPA) long-chain polyunsaturated fatty acids (PUFA) by oral gavage (n=8/group) at the phylum level. **B** Relative abundance of the 16S rRNA sequences corresponding to the Ruminococcaceae family (n=8/group). Data corresponds to the baseline conditions of Figure 4D. Graphs are mean  $\pm$  SEM.

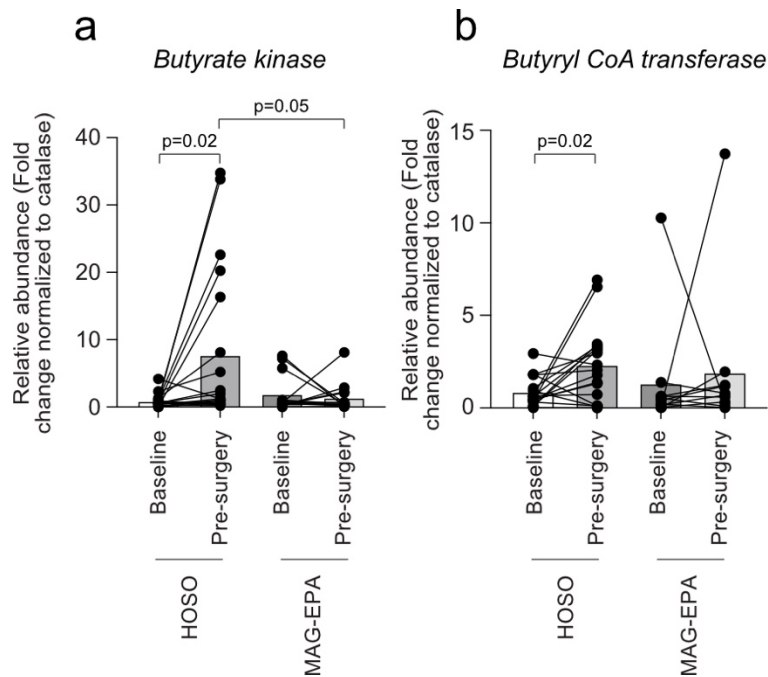

**Supplementary Fig. 4. Short-chain fatty acid-related enzymes are modulated by a dietary intervention in prostate cancer patients.** A randomized clinical trial (NCT02333435) was performed at our clinical facility testing the effect of MAG-EPA PUFA on prostate cancer patients before radical prostatectomy. A subset of 41 patients donated fecal samples for research. Using DNA extracted from fecal samples, we used qPCR to compare the profiles corresponding to men before and after 4-10 weeks of MAG-EPA (n=21) supplementation or HOSO placebo (n=20). The relative abundance of sequences corresponding to rate-limiting enzymes implicated in the biosynthesis of butyric acid (A and B) were measured by qPCR and normalized with bacterial catalase DNA levels. **A** The levels of Butyrate kinase and **B** Butyryl CoA transferase were compared patients receiving MAG-EPA or HOSO 7.2 ± 0.43 weeks prior to radical prostatectomy (Pre-surgery) and their levels at baseline. Graphs are mean ± SEM, two-sided Welch's T test.

**Supplementary table 1. Clinical and pathological characteristics of patients pre-radical prostatectomy** (corresponding to Figure 1 A-D).

| Characteristic                            | Tumor volume | Low <sup>1</sup><br>(n=19) | Medium <sup>2</sup><br>(n=20) | High <sup>3</sup><br>(n=23) | p-value                        |
|-------------------------------------------|--------------|----------------------------|-------------------------------|-----------------------------|--------------------------------|
| Age at radical prostatectomy (y.o)        |              |                            |                               |                             | 0.75 <sup>8</sup>              |
| Mean (SD)                                 |              | 66.8 (6.9)                 | 65.3 (5.4)                    | 66.5 (7.6)                  |                                |
| Body mass index (kg/m <sup>2</sup> )      |              |                            |                               |                             | 0.54 <sup>8</sup>              |
| Mean (SD)                                 |              | 27.6 (4.6)                 | 27.0 (3.3)                    | 28.3 (3.8)                  |                                |
| PSA at prostate biopsy (ng/mL)            |              |                            |                               |                             | 0.06 <sup>8</sup>              |
| Mean (SD)                                 |              | 7.4 (9.3)                  | 5.8 (3.2) <sup>4</sup>        | 16.0 (11.2)                 |                                |
| Min, max                                  |              | 1.1, 44.5                  | 3.3, 9.8                      | 4.5, 39.0                   |                                |
| Median (Q1, Q3)                           |              | 5.7 (4.1, 6.5)             | 5.0 (4.4, 7.1)                | 12.4 (6.8, 21.0)            |                                |
| PSA at radical prostatectomy (ng/mL)      |              |                            |                               |                             | 0.16 <sup>8</sup>              |
| Mean (SD)                                 |              | 6.6 (8.7)                  | 6.1 (3.8) <sup>5</sup>        | 13.0 (9.4) <sup>6</sup>     |                                |
| Min, max                                  |              | 0.9, 41.4                  | 1.4, 16.0                     | 3.7, 32.9                   |                                |
| Median (Q1, Q3)                           |              | 5.0 (3.6, 6.1)             | 5.0 (3.9, 7.3)                | 10.2 (6.4, 18.1)            |                                |
| ISUP grade group at biopsy, n (%)         |              |                            |                               |                             | 0.42 <sup>9</sup>              |
| 1 (Gleason 6)                             |              | 0 (0.0)                    | (0.0)                         | 1 (4.3)                     |                                |
| 2 (Gleason 3+4)                           |              | 13 (68.4)                  | 12 (60.0)                     | 8 (34.8)                    |                                |
| 3 (Gleason 4+3)                           |              | 3 (15.8)                   | 4 (20.0)                      | 7 (30.4)                    |                                |
| 4 (Gleason 8)                             |              | 2 (10.5)                   | 3 (15.0)                      | 4 (17.4)                    |                                |
| 5 (Gleason 9+)                            |              | 1 (5.3)                    | 1 (5.0)                       | 3 (13.1)                    |                                |
| ISUP grade group at prostatectomy, n (%)  |              |                            |                               |                             | 0.26 <sup>10</sup>             |
| 2 (Gleason 3+4)                           |              | 13 (68.4)                  | 13 (65.0)                     | 10 (43.5)                   |                                |
| 3 (Gleason 4+3)                           |              | 3 (15.8)                   | 5 (25.0)                      | 5 (21.8)                    |                                |
| 4 (Gleason 8)                             |              | 1 (5.3)                    | 1 (5.0)                       | 1 (4.3)                     |                                |
| 5 (Gleason 9+)                            |              | 2 (10.5)                   | 1 (5.0)                       | 7 (30.4)                    |                                |
| Clinical T stage at biopsy, n (%)         |              |                            |                               |                             | <b>0.01</b> <sup>11</sup>      |
| T2a or less                               |              | 18 (94.7)                  | 18 (90.0)                     | 14 (90.0)                   |                                |
| T2b or T2c                                |              | 0 (0.0)                    | 2 (10.0)                      | 7 (10.0)                    |                                |
| T3 or more                                |              | 1 (5.3)                    | 0 (0.0)                       | 2 (0.0)                     |                                |
| Pathological T stage, n (%)               |              |                            |                               |                             | <b>&lt;0.001</b> <sup>12</sup> |
| T2a or less                               |              | 2 (10.5)                   | 4 (20.0)                      | 7 (30.4)                    |                                |
| T2b or T2c                                |              | 15 (79.0)                  | 9 (45.0)                      | 3 (13.1)                    |                                |
| T3 or more                                |              | 2 (10.5)                   | 7 (35.0)                      | 13 (56.5)                   |                                |
| Pathological N stage, n (%)               |              |                            |                               |                             | <b>0.01</b> <sup>13</sup>      |
| N0                                        |              | 19 (100.0)                 | 20 (100.0)                    | 18 (78.3)                   |                                |
| N1                                        |              | 0 (0.0)                    | 0 (0.0)                       | 4 (17.4)                    |                                |
| N2                                        |              | 0 (0.0)                    | 0 (0.0)                       | 1 (4.3)                     |                                |
| Pathological M stage, n (%)               |              |                            |                               |                             | -----                          |
| M0                                        |              | 10 (52.6)                  | 12 (60.0)                     | 15 (65.2)                   |                                |
| M1                                        |              | 0 (0.0)                    | 0 (0.0)                       | 0 (0.0)                     |                                |
| Mx                                        |              | 9 (47.4)                   | 5 (25.0)                      | 8 (34.8)                    |                                |
| Estimated tumor mass at prostatectomy (g) |              |                            |                               |                             | <b>&lt;0.001</b> <sup>8</sup>  |
| Mean (SD)                                 |              | 3.2 (1.4)                  | 7.4 (1.4)                     | 18.7 (12.7)                 |                                |

<sup>1</sup> Estimated tumor mass <5.5g calculated as follow: prostate weight (g) \* % of tumor at surgery. <sup>2</sup> Estimated tumor mass ≥5.5g <10g. <sup>3</sup> Estimated tumor mass ≥10g. <sup>4</sup> One missing value. <sup>5</sup> 5 patients did not have a PSA measure at RP. <sup>6</sup> 6 patients did not have a PSA measure at RP. <sup>7</sup> 3 missing values. <sup>8</sup> Based on two-way ANOVA test. <sup>9</sup> Based on Exact Pearson Chi-Square Test, combining ISUP grade group 2 or less, as well as grade group 4 or more. <sup>10</sup> Based on Exact Pearson Chi-Square Test, combining ISUP grade group 4 or more. <sup>11</sup> Based on Exact Pearson Chi-Square Test, combining clinical stage T2b or more. <sup>12</sup> Based on Exact Pearson Chi-Square Test. <sup>13</sup> Based on Exact Pearson Chi-Square Test, combining clinical N stage N1/N2. Q: Quartile, PSA: Prostate-specific antigen, MAG-EPA: monoacylglyceride-conjugated eicosapentaenoic acid; ISUP: International society of urological pathology.

**Supplementary table 2. Clinical and pathological characteristics of patients post-radical prostatectomy**  
(corresponding to Figure 1 E-H).

| Characteristic                              | BCR status | None <sup>1</sup><br>(n=20) | Low PSA <sup>2</sup><br>(n=9) | High PSA <sup>3</sup><br>(n=18) | p-value                   |
|---------------------------------------------|------------|-----------------------------|-------------------------------|---------------------------------|---------------------------|
| Age at RP (y.o)                             |            |                             |                               |                                 | 0.10 <sup>7</sup>         |
| Mean (SD)                                   |            | 67.0 (5.6)                  | 63.9 (6.2)                    | 62.6 (7.2)                      |                           |
| Body mass index at RP (kg/m <sup>2</sup> )  |            |                             |                               |                                 | 0.53 <sup>7</sup>         |
| Mean (SD)                                   |            | 27.9 (4.5)                  | 26.5 (3.1)                    | 26.9 (2.7)                      |                           |
| PSA at prostate biopsy (ng/mL)              |            |                             |                               |                                 | 0.54 <sup>7</sup>         |
| Mean (SD)                                   |            | 15.2 (9.1) <sup>4</sup>     | 8.0 (6.7)                     | 14.1 (24.0) <sup>5</sup>        |                           |
| Min, max                                    |            | 4.7, 39.0                   | 3.0, 22.0                     | 3.7, 105.9                      |                           |
| Median (Q1, Q3)                             |            | 8.4 (7.1, 16.4)             | 5.2 (4.3, 8.6)                | 5.2 (4.3, 8.6)                  |                           |
| PSA at RP (ng/mL)                           |            | NA                          | NA                            | NA                              | NA                        |
| ISUP grade group at biopsy, n (%)           |            |                             |                               |                                 | 0.32 <sup>8</sup>         |
| 1 (Gleason 6)                               |            | 1 (5.0)                     | (0.0)                         | 2 (11.1)                        |                           |
| 2 (Gleason 3+4)                             |            | 12 (60.0)                   | 6 (66.7)                      | 3 (16.7) <sup>6</sup>           |                           |
| 3 (Gleason 4+3)                             |            | 3 (15.0)                    | 2 (22.2)                      | 6 (33.3) <sup>6</sup>           |                           |
| 4 (Gleason 8)                               |            | 2 (10.0)                    | 1 (11.1)                      | 1 (5.6)                         |                           |
| 5 (Gleason 9+)                              |            | 2 (10.0)                    | 0 (0.0)                       | 3 (16.7)                        |                           |
| ISUP grade group at RP, n (%)               |            |                             |                               |                                 | 0.09 <sup>8</sup>         |
| 1 (Gleason 6)                               |            | 0 (0.0)                     | 0 (0.0)                       | 1 (5.6)                         |                           |
| 2 (Gleason 3+4)                             |            | 15 (75.0)                   | 6 (66.7)                      | 5 (27.8)                        |                           |
| 3 (Gleason 4+3)                             |            | 2 (10.0)                    | 2 (22.2)                      | 4 (22.2)                        |                           |
| 4 (Gleason 8)                               |            | 1 (5.0)                     | 0 (0.0)                       | 4 (22.2)                        |                           |
| 5 (Gleason 9+)                              |            | 2 (10.0)                    | 1 (11.1)                      | 4 (22.2)                        |                           |
| Clinical T stage, n (%)                     |            |                             |                               | <sup>5</sup>                    | 0.46 <sup>9</sup>         |
| T2a or less                                 |            | 14 (70.0)                   | 8 (88.9)                      | 14 (77.8)                       |                           |
| T2b or T2c                                  |            | 5 (25.0)                    | 1 (11.1)                      | 2 (11.1)                        |                           |
| T3 or more                                  |            | 1 (5.0)                     | 0 (0.0)                       | 1 (5.6)                         |                           |
| Pathological T stage, n (%)                 |            |                             |                               |                                 | <b>0.01</b> <sup>10</sup> |
| T2a or less                                 |            | 9 (45.0)                    | 1 (11.1)                      | 1 (5.6)                         |                           |
| T2b or T2c                                  |            | 3 (15.0)                    | 5 (55.6)                      | 5 (27.8)                        |                           |
| T3 or more                                  |            | 8 (40.0)                    | 3 (33.3)                      | 12 (66.7)                       |                           |
| Pathological N stage, n (%)                 |            |                             |                               |                                 | 0.06 <sup>11</sup>        |
| N0                                          |            | 19 (95.0)                   | 8(88.9)                       | 12 (66.7)                       |                           |
| N1                                          |            | 1 (5.0)                     | 1 (11.1)                      | 4 (22.2)                        |                           |
| N2                                          |            | 0 (0.0)                     | 0 (0.0)                       | 2 (11.1)                        |                           |
| Pathological M stage, n(%)                  |            |                             |                               |                                 | -----                     |
| M0                                          |            | 10 (40.0)                   | 4 (44.4)                      | 16 (88.9)                       |                           |
| M1                                          |            | 0 (0.0)                     | 0 (0.0)                       | 0 (0.0)                         |                           |
| Mx                                          |            | 10 (45.0)                   | 5 (55.6)                      | 2 (11.1)                        |                           |
| Estimated tumor mass at RP <sup>4</sup> (g) |            |                             |                               |                                 | 0.99 <sup>7</sup>         |
| Mean (SD)                                   |            | 12.9 (13.2)                 | 13.2 (9.2)                    | 17.5 (21.4) <sup>5</sup>        |                           |
| Min, Max                                    |            | 4.5, 63.7                   | 1.6, 32.0                     | 0.9, 88.0                       |                           |
| Median (Q1, Q3)                             |            | 8.6 (6.3, 13.7)             | 14.0 (6.8, 17.6)              | 9.9 (4.8, 17.2)                 |                           |

<sup>1</sup> Patients with no BCR following surgery, <sup>2</sup> Patients who experienced ultrasensible BCR following a curative intent RP (PSA level <0.5ng/mL), <sup>3</sup> Patients who experienced a clinical BCR following a curative intent RP (PSA level >0.5ng/mL). <sup>4</sup> Estimated tumor mass calculated as follow: prostate weight (g) \* % of tumor at surgery. <sup>5</sup> One missing value. <sup>6</sup> 3 patients had a Gleason 7 at BP, with no specification of primary and secondary pattern. <sup>7</sup> Based on two-way ANOVA test. <sup>8</sup> Based on Exact Pearson Chi-Square Test, combining ISUP grade group 2 or less, as well as grade group 4 or more. <sup>9</sup> Based on Exact Pearson Chi-Square Test, combining clinical stage T2b or more. <sup>10</sup> Based on Exact Pearson Chi-Square Test. <sup>11</sup> Based on Exact Pearson Chi-Square Test, combining clinical N stage N1/N2. Q: Quartile, PSA: Prostate-specific antigen, MAG-EPA: monoacylglyceride-conjugated eicosapentaenoic acid, ISUP: International society of urological pathology, RP: Radical prostatectomy, BCR: Biochemical recurrence.

**Supplementary table 3. Clinical characteristics of donor patients for fecal microbiota transfers**  
(Corresponding to Figure 3).

| <b>Characteristic</b>                       | <b>Donor 1</b> | <b>Donor 2</b> | <b>Donor 3</b> | <b>Donor 4</b> | <b>Donor 5</b> | <b>Donor 6</b> |
|---------------------------------------------|----------------|----------------|----------------|----------------|----------------|----------------|
| Age (y.o)                                   | 71.2           | 65.4           | 63.5           | 72.4           | 65.8           | 68.0           |
| Body mass index (kg/m <sup>2</sup> )        | 26.1           | 25.0           | 32.3           | 28.1           | 27.3           | 27.5           |
| PSA (ng/mL)                                 | 44.48          | 5.91           | 4.82           | 20.27          | 6.69           | 11.63          |
| ISUP grade group <sup>1</sup>               | 4              | 2              | 3              | 5              | 3              | 4              |
| Cancer stage                                | T1c            | T1c            | T1c            | T3             | T1c            | T2b            |
| Estimated tumor mass at RP <sup>2</sup> (g) | 1.2            | 3.4            | 9.4            | 10.0           | 10.3           | 21.0           |

<sup>1</sup> International society of urological pathology grade group: 2 = Gleason 7 (3+4), 3 = Gleason 7 (4+3), 4= Gleason 8, 5= Gleason 9+.

<sup>2</sup> Estimated tumor mass calculated as follow: prostate weight (g) \* % of tumor at surgery. RP: radical prostatectomy, PSA: Prostate-specific antigen.



**Supplementary table 4. Baseline characteristics of patients enrolled in the clinical trial (corresponding to Figure 5).**

| Characteristic                                                                                   | Placebo<br>(n=20)                            | MAG-EPA<br>(n=21)                           | p-value           |
|--------------------------------------------------------------------------------------------------|----------------------------------------------|---------------------------------------------|-------------------|
| Age (y.o)<br>Mean (SD)                                                                           | 65.8 (7.0)                                   | 65.9 (7.0)                                  | 0.97 <sup>1</sup> |
| Body mass index (kg/m <sup>2</sup> )<br>Mean (SD)                                                | 27.6 (4.5)                                   | 27.1 (2.9)                                  | 0.70 <sup>1</sup> |
| PSA (ng/mL)<br>Mean (SD)<br>Min, max<br>Median (Q1, Q3)                                          | 6.3 (4.4)<br>1.1, 23.0<br>5.7 (4.2, 6.6)     | 10.8 (10.4)<br>2.3, 44.5<br>7.7 (4.7, 6.7)  | 0.08 <sup>1</sup> |
| ISUP grade group, n (%)<br>2 (Gleason 3+4)<br>3 (Gleason 4+3)<br>4 (Gleason 8)<br>5 (Gleason 9+) | 12 (60.0)<br>5 (25.0)<br>3 (15.0)<br>0 (0.0) | 9 (42.9)<br>6 (28.6)<br>4 (19.0)<br>2 (9.5) | 0.47 <sup>2</sup> |
| Cancer stage, n (%)<br>T2a or less<br>T2b or T2c<br>T3 or more                                   | 19 (95.0)<br>1 (5.0)<br>0 (0.0)              | 17 (81.0)<br>2 (9.5)<br>2 (9.5)             | 0.17 <sup>3</sup> |

<sup>1</sup> Based on two-sided Student's t-test. <sup>2</sup> Based on an Exact Pearson Chi-Square Test, combining ISUP grade group 4 or more. <sup>3</sup> Based on an Exact Pearson Chi-Square Test, combining cancer stage T2b or more. SD: Standard deviation, Q: Quartile, NCCN: National Comprehensive Cancer Network, PSA: Prostate-specific antigen, MAG-EPA: monoacylglyceride-conjugated eicosapentaenoic acid; ISUP: International society of urological pathology.

**Supplementary table 5. Characteristics at prostatectomy of patients enrolled in the clinical trial (corresponding to Figure 5).**

| Characteristic              | Placebo (n=20)         | MAG-EPA (n=21)  | p-value                 |
|-----------------------------|------------------------|-----------------|-------------------------|
| PSA (ng/mL)                 |                        |                 | 0.08 <sup>2</sup>       |
| Mean (SD)                   | 5.6 (4.2) <sup>1</sup> | 9.9 (10.0)      |                         |
| Min, max                    | 0.9, 20.6              | 2.0, 41.4       |                         |
| Median (Q1, Q3)             | 4.9 (3.8, 6.2)         | 6.34 (3.8, 6.1) |                         |
| ISUP Grade group, n (%)     |                        |                 | 0.84 <sup>3</sup>       |
| 2 (Gleason 3+4)             | 11 (55.0)              | 10 (47.6)       |                         |
| 3 (Gleason 4+3)             | 5 (25.0)               | 7 (33.3)        |                         |
| 4 (Gleason 8)               | 1 (5.0)                | 1 (4.8)         |                         |
| 5 (Gleason 9+)              | 3 (15.0)               | 3 (14.3)        |                         |
| Pathological T stage, n (%) |                        |                 | 0.81 <sup>4</sup>       |
| T2a or less                 | 1 (5.0)                | 2 (9.5)         |                         |
| T2b or T2c                  | 12 (60.0)              | 13 (61.9)       |                         |
| T3 or more                  | 7 (35.0)               | 6 (28.6)        |                         |
| Grade reclassification      |                        |                 | <b>0.05<sup>5</sup></b> |
| Upgrade                     | 6 (30.0)               | 2 (9.5)         |                         |
| Same                        | 13 (65.0)              | 15 (71.4)       |                         |
| Downgrade                   | 1 (5.0)                | 4 (19.4)        |                         |

<sup>1</sup> One patient did not have a PSA measure at RP. <sup>2</sup> Based on two-sided Student's t-test. <sup>3</sup> Based on an Exact Pearson Chi-Square Test, combining ISUP grade group 4 or more. <sup>4</sup> Based on an Exact Pearson Chi-Square Test. <sup>5</sup> Based on ordinal logistic regression comparing the change over the intervention time between groups. SD: Standard deviation, Q: Quartile, PSA: Prostate-specific antigen, MAG-EPA: monoacylglyceride-conjugated eicosapentaenoic acid; ISUP: International society of urological pathology; RP: radical prostatectomy.
